# Supplementary material for: Insulina inhalada: nueva información de seguridad
Source: Royal Society of Chemistry journal article supplement (doi:10.1039/d1nr02480a), 2008-01-01
Supplement: d1nr02480a1.pdf [file d1nr02480a1.pdf]

## Electronic Supplementary Information

### Switching interlayer magnetic order in bilayer CrI<sub>3</sub> by stacking reversal

Xiangru Kong,<sup>1,\*</sup> Hongkee Yoon,<sup>2,\*</sup> Myung Joon Han,<sup>2,†</sup> and Liangbo Liang<sup>1,†</sup>

<sup>1</sup>*Center for Nanophase Materials Sciences,*

*Oak Ridge National Laboratory (ORNL), Oak Ridge, Tennessee 37831, USA*

<sup>2</sup>*Department of Physics, Korea Advanced Institute of Science  
and Technology (KAIST), Daejeon 34141, Republic of Korea*

---

\* These authors contributed equally to this work

† Corresponding authors: [mj.han@kaist.ac.kr](mailto:mj.han@kaist.ac.kr); [liangl1@ornl.gov](mailto:liangl1@ornl.gov)

| Stacking | $R\bar{3}$ | $R\bar{3}$ -r | $C2/m$ | $C2/m$ -r | AA   | AA-r |
|----------|------------|---------------|--------|-----------|------|------|
| FM       | 3.44       | 4.01          | 3.49   | 3.48      | 3.60 | 4.10 |
| AFM      | 3.46       | 4.00          | 3.48   | 3.49      | 3.59 | 4.06 |

Table S1. The averaged interlayer distance with the unit of Å in bilayer CrI<sub>3</sub> at different stacking patterns. The values are from the structures relaxed by Liechtenstein's DFT+ $U$  approach with  $U = 3.9$  eV and  $J = 1.1$  eV. The difference of the interlayer distance between the FM and AFM order for each stacking is small. The difference of the interlayer distance between  $C2/m$  and  $C2/m$ -r is also small. However, it is not the case for stacking patterns of  $R\bar{3}$  and AA: the interlayer distance of  $R\bar{3}$ -r is about 0.54~0.57 Å larger than that of  $R\bar{3}$ ; the interlayer distance of AA-r is about 0.47~0.50 Å larger than that of AA. From the side views of Figure 1 in the main text, we can observe that in  $R\bar{3}$ -r and AA-r stackings, the I atom in the bottom sublayer of the top CrI<sub>3</sub> layer (I2b) sits almost directly above I1t, the I atom in the top sublayer of the bottom CrI<sub>3</sub> layer. Therefore, the orbitals from I2b and I1t atoms in these two stackings tend to repel each other, and push the top and bottom CrI<sub>3</sub> layers farther away, compared to their non-rotated stacking counterparts. This explains their larger interlayer distances (above 4.00 Å), and why their total energies are notably higher in comparison with the corresponding non-rotated stacking patterns  $R\bar{3}$  and AA (Figure 2 in the main text). In contrast, for  $C2/m$ -r stacking, the rotation does not lead to I2b over I1t, and thus the interlayer distance barely changes compared to the non-rotated  $C2/m$  stacking, which explains why  $C2/m$ -r and  $C2/m$  share similar total energies.

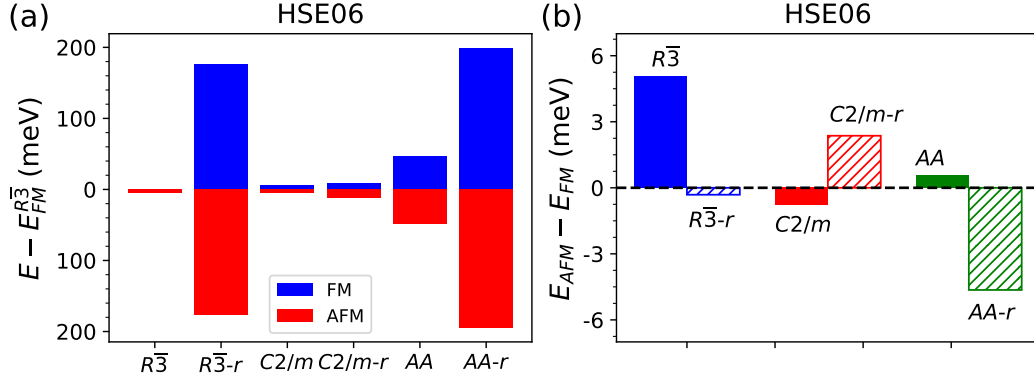

Figure S1. (a) The total energy of bilayer  $\text{CrI}_3$  by hybrid functional (HSE06) calculations in all six stacking patterns ( $R\bar{3}$ ,  $R\bar{3}-r$ ,  $C2/m$ ,  $C2/m-r$ ,  $AA$ , and  $AA-r$ ) with interlayer FM or AFM order.  $R\bar{3}$  stacking with the FM order has the lowest energy and thus was used as the zero energy reference. (b) The energy differences between AFM and FM bilayer  $\text{CrI}_3$  at different stacking orders computed by the HSE06 method. The HSE06 results without use of any  $U$  and  $J$  parameters are similar to those of Liechtenstein's DFT+ $U$  approach with  $U = 3.9$  eV and  $J = 1.1$  eV. This confirms that the  $180^\circ$  stacking rotation can switch the magnetic ground state for all three stacking orders.
